# Supplementary material
Source: MDPI journal article supplement (https://www.mdpi.com/2673-4605/6/1/24)
Supplement: s1 [file s1]

## Corrosion behavior of Fe-based amorphous/nanocrystalline composite coating: correlating the influence of porosity and amorphicity

Sapan K. Nayak<sup>1</sup>, Anil Kumar<sup>2</sup>, Kuntal Sarkar<sup>3</sup>, Atanu Banerjee<sup>4</sup>, Tapas Laha<sup>5</sup>

<sup>1, 2, 5</sup> Department of Metallurgical and Materials Engineering, IIT Kharagpur, India

<sup>3, 4</sup> Research and Development Division, Tata Steel, Jamshedpur, India

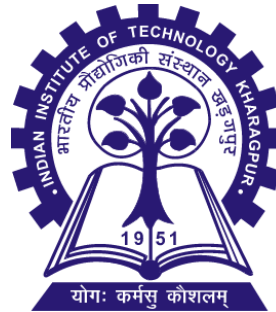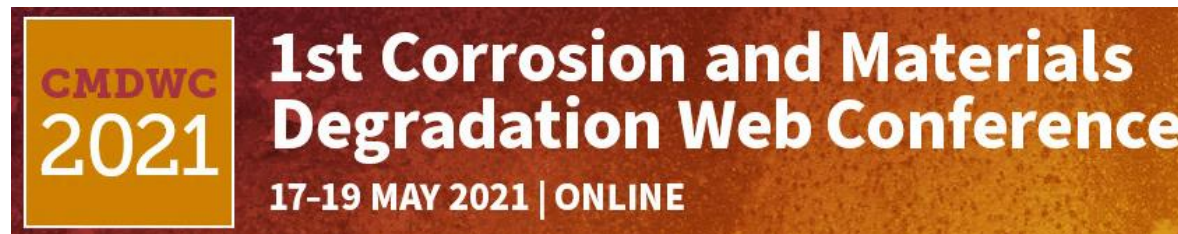

Organized by

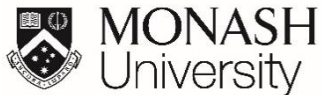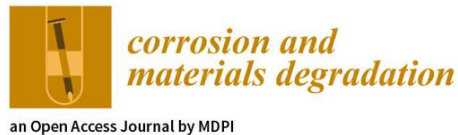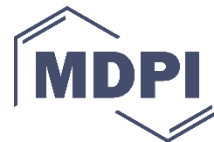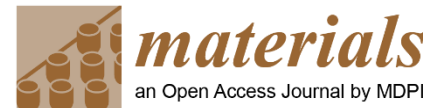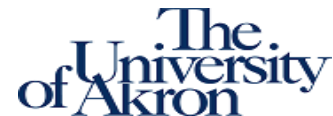

17-19 May, 2021

- ❑ **Fe-based amorphous coating**
  - Excellent mechanical and corrosion properties
  - Optimized properties → strength of amorphous structure and ductility of metallic substrate
  - Can be applied to complex parts
  - Inexpensiveness
  - Poor plasticity → limited industrial application

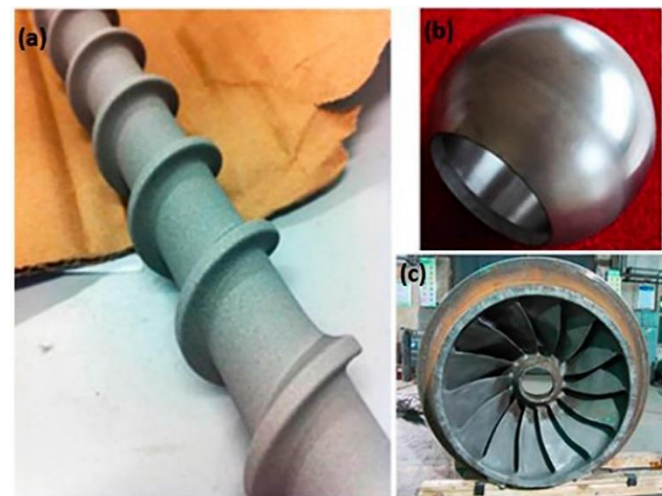

H. X. Li et al., Prog. Mat. Sci. 103 (2019) 235-318

- ❑ **Fe-based amorphous/nanocrystalline composite coating**
  - No issue with poor plasticity
- ❑ **Fe-based composite coating synthesized by thermal spraying**

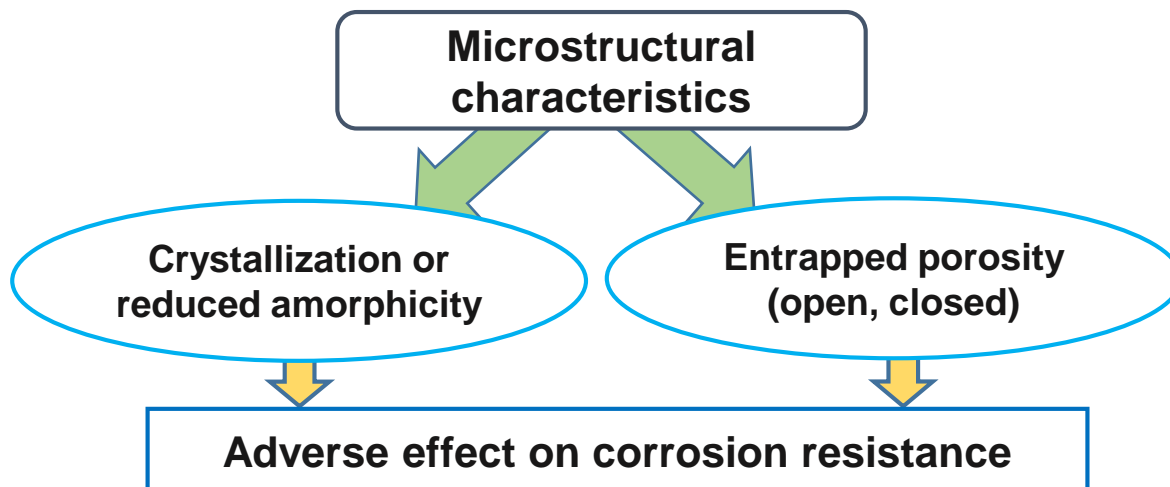

***Dominant microstructural characteristic??***

***Help in designing new amorphous composite coatings with improved corrosion resistance.***

## I. Synthesis of the coatings and the ribbons

### *Spraying parameters of HVOF process for deposition of coatings*

| Spray parameters                    | Coatings           |                    |
|-------------------------------------|--------------------|--------------------|
|                                     | Coating [30 g/min] | Coating [50 g/min] |
| Oxygen flow rate (SLPM)             | 270                |                    |
| Fuel gas flow rate (SLPM)           | 55-60              |                    |
| Air flow rate (SLPM)                | 460                |                    |
| Carrier gas flow rate (SCFH)        | 15-18              |                    |
| Spray distance (mm)                 | 150                |                    |
| Powder feed rate (g/min)            | 30                 | 50                 |
| Coating thickness ( $\mu\text{m}$ ) | 150 $\pm$ 15       |                    |

### *Melt-spinning parameters for ribbons*

| Ribbons                      | Wheel speed (rpm) |
|------------------------------|-------------------|
| Fully amorphous (FA-Rib)     | 2100              |
| Partially amorphous (PA-Rib) | 1400              |

*Preparation of the different coatings along with the ribbons  $\rightarrow$  identifying effect of amorphous content and porosity individually on the corrosion behavior of the sprayed coatings*

## II. Electrochemical characterization

- Electrolyte: 3.5 wt% NaCl solution
- Potentiodynamic polarization study: scan rate of 0.5 mV/s after 1 h of immersion for stabilization of open circuit potential (OCP)
- EIS test (OCP): sinusoidal amplitude of 10 mV in the frequency range of  $10^5$  to  $10^{-2}$  Hz
- Potentiostatic test at 500 mV<sub>SCE</sub>: passive film

## III. Analysis of corroded samples

- Raman spectrometer (Co laser of 532 nm wavelength): compositional analysis
- Auger electron spectroscopy: depth profiling  $\rightarrow$  effective sputtering rate of 1.8 nm min<sup>-1</sup>

## Morphology of the synthesized ribbons and coatings

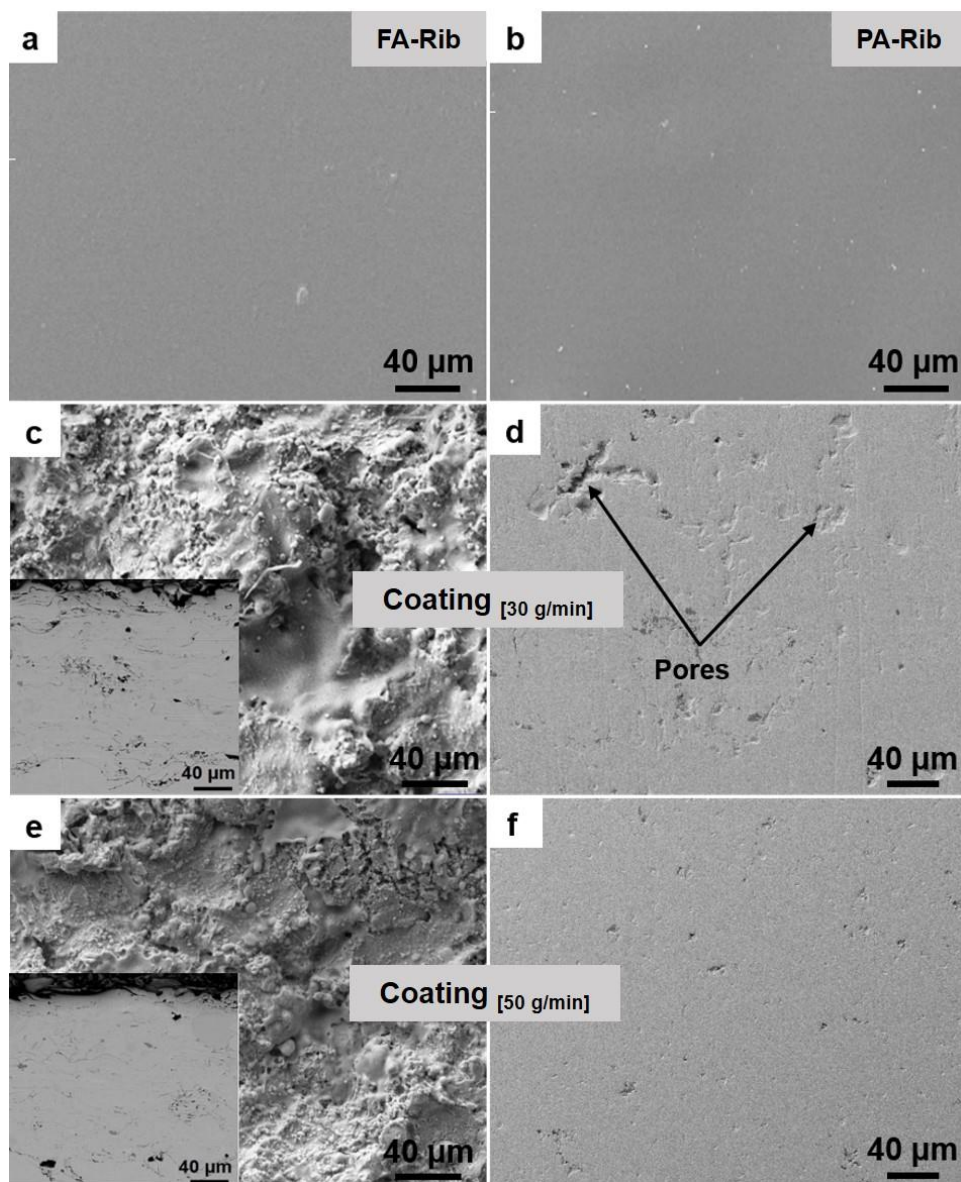

Composition:  $\text{Fe}_{63}\text{Cr}_9\text{B}_{16}\text{C}_7\text{P}_5$ , at. %

| Sample             | Porosity (vol.%) |
|--------------------|------------------|
| FA-Rib             | –                |
| PA-Rib             | –                |
| Coating [30 g/min] | $4.9 \pm 0.6$    |
| Coating [50 g/min] | $1.8 \pm 0.4$    |

- Ribbons → porosity free structure
- Coating [30 g/min] → greater extent of molten particles and inferior inter-splat bonding and higher amount of porosity than that of Coating [50 g/min]

SEM images of the ribbons: (a) FA-Rib, (b) PA-Rib, and the coatings: (c–d) Coating [30 g/min] and (e–f) Coating [50 g/min]

S.K. Nayak et al., J. Alloys Compd. 849 (2020) 156624



## Phase evolution in the ribbons and the coatings

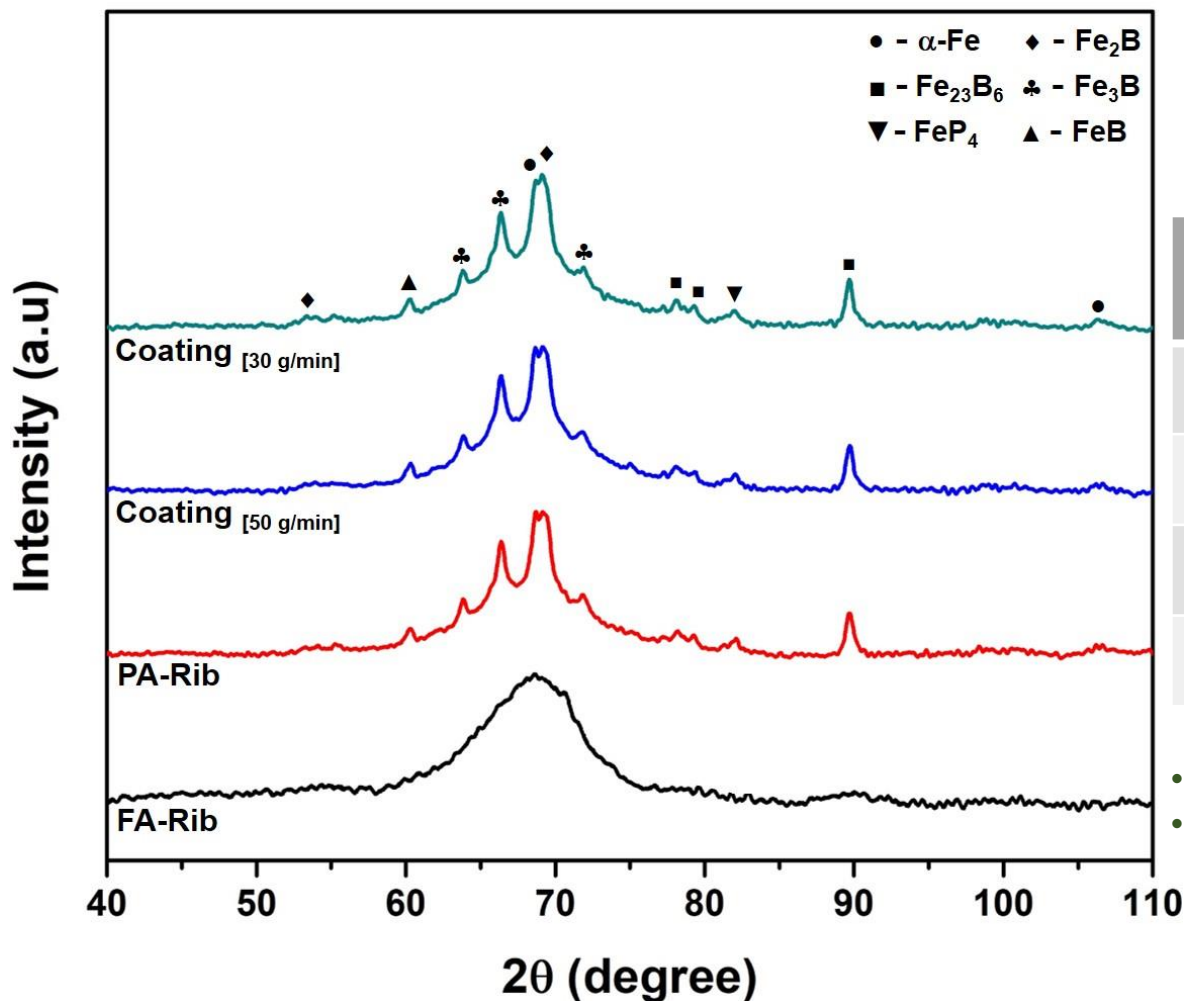

XRD patterns of FA-Rib, PA-Rib and the coatings

$$V_{amor} = \frac{A_{amor}}{A_{amor} + A_{Cryst}}$$

| Sample             | Amorphous content (%) |
|--------------------|-----------------------|
| FA-Rib             | 100                   |
| PA-Rib             | 66                    |
| Coating [30 g/min] | 65                    |
| Coating [50 g/min] | 63                    |

- FA-Rib → fully amorphous nature
- Amorphous content was almost same for PA-Rib, Coating [50 g/min] and Coating [30 g/min]

## Phase evolution in the ribbons and the coatings

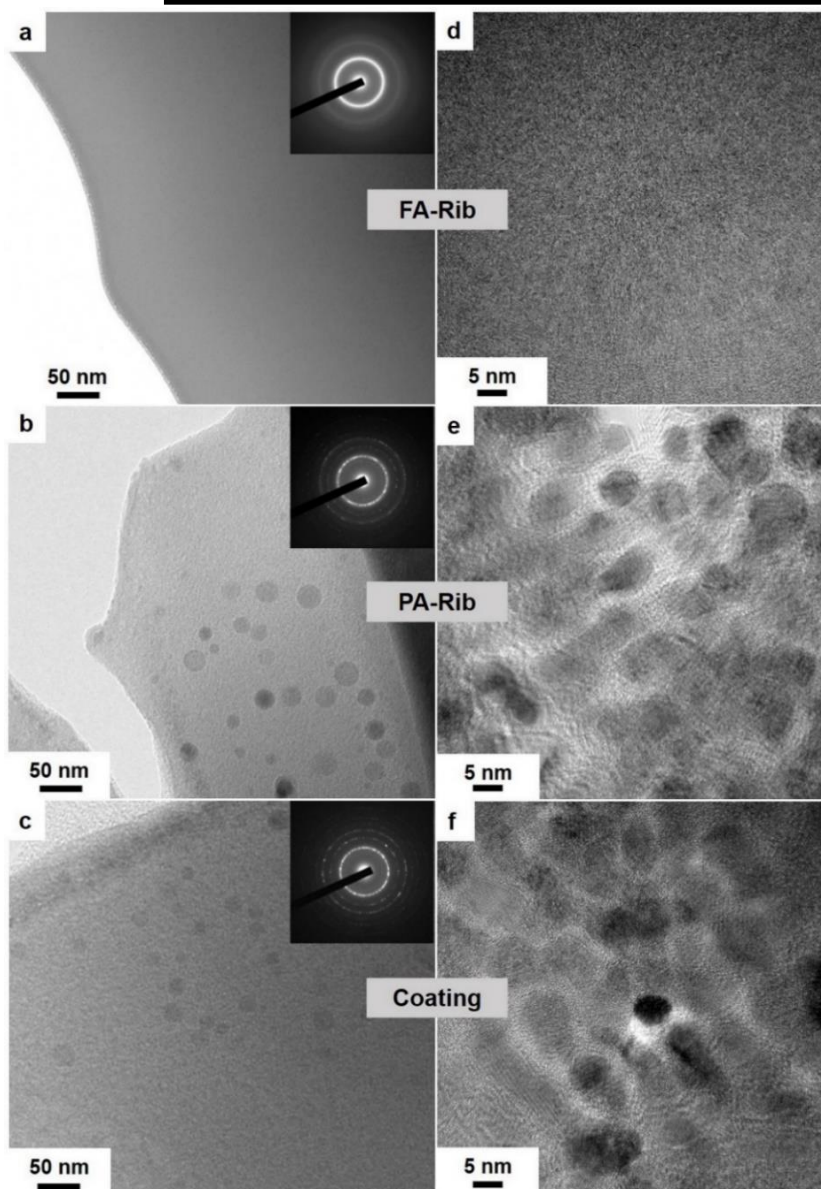

- FA-Rib → fully amorphous structure is confirmed
- Nanocrystalline phases dispersed in the amorphous matrix of PA-Rib and Coating [50 g/min]

TEM images of (a) FA-Rib, (b) PA-Rib and (c) Coating [50 g/min] with corresponding SAED patterns in insets depicting variation in amorphicity, and HRTEM micrographs of (d) FA-Rib, (e) PA-Rib and (f) the coating

S.K. Nayak et al., *J. Alloys Compd.* 849 (2020) 156624

## Corrosion behavior: Potentiodynamic Polarization

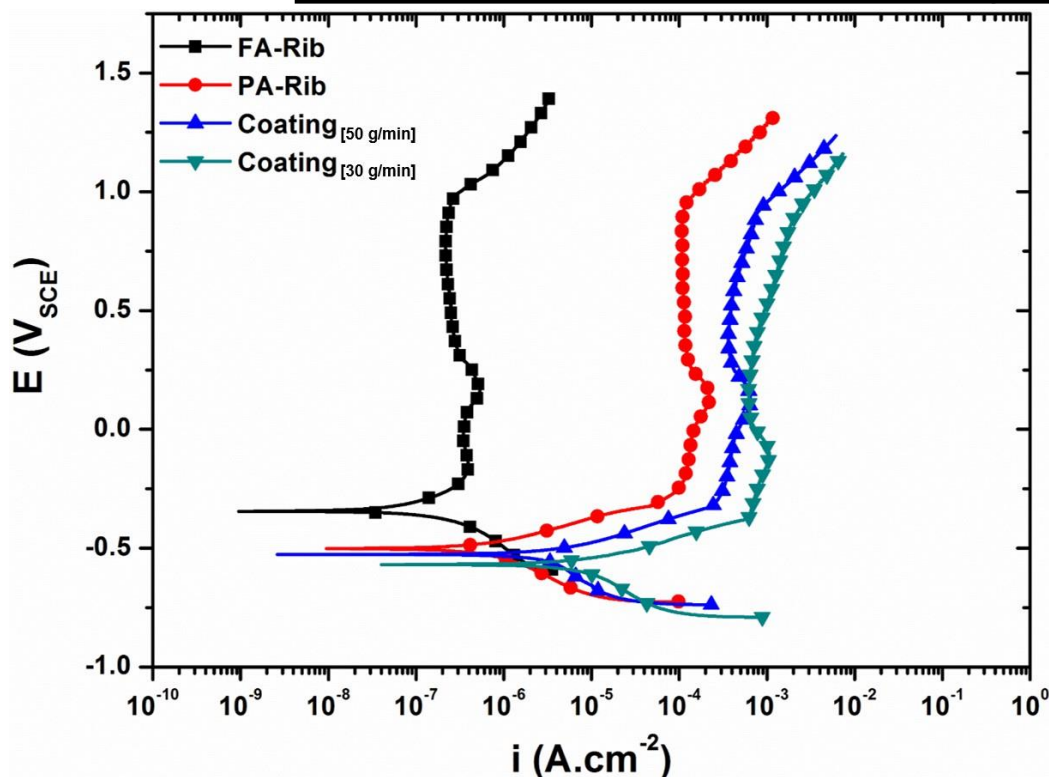

Potentiodynamic polarization curves of the different ribbons and the coatings in 3.5 wt. % NaCl solution

- Corrosion of the amorphous matrix increased substantially due to its partial crystallization compared to porosity effect.

| Sample             | $E_{corr}$ (mV) | $i_{corr}$ ( $\mu\text{A}\cdot\text{cm}^{-2}$ ) | $i_{pass}$ ( $\mu\text{A}\cdot\text{cm}^{-2}$ ) | $E_{pit}$ (mV) |
|--------------------|-----------------|-------------------------------------------------|-------------------------------------------------|----------------|
| FA-Rib             | $-344 \pm 4$    | $0.09 \pm 0.01$                                 | $0.26 \pm 0.09$                                 | $982 \pm 4$    |
| PA-Rib             | $-501 \pm 5$    | $0.62 \pm 0.10$                                 | $114.7 \pm 8.6$                                 | $937 \pm 6$    |
| Coating [50 g/min] | $-524 \pm 7$    | $3.2 \pm 0.4$                                   | $386.5 \pm 7.3$                                 | $923 \pm 5$    |
| Coating [30 g/min] | $-567 \pm 8$    | $8.3 \pm 0.6$                                   | $873.4 \pm 9.7$                                 | $908 \pm 9$    |

S.K. Nayak et al., J. Alloys Compd. 849 (2020) 156624

## Corrosion behavior: Electrochemical Impedance Spectroscopy

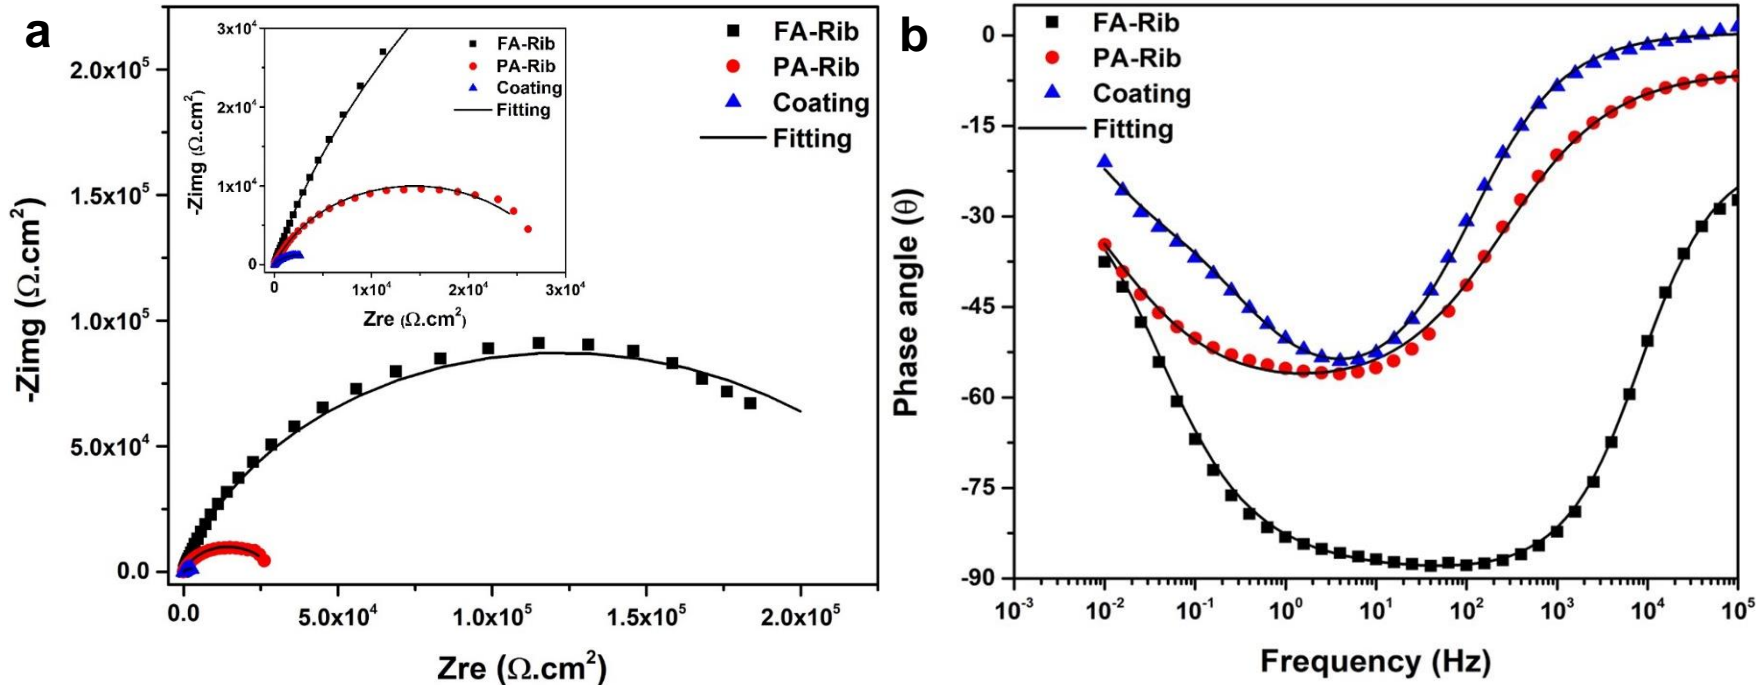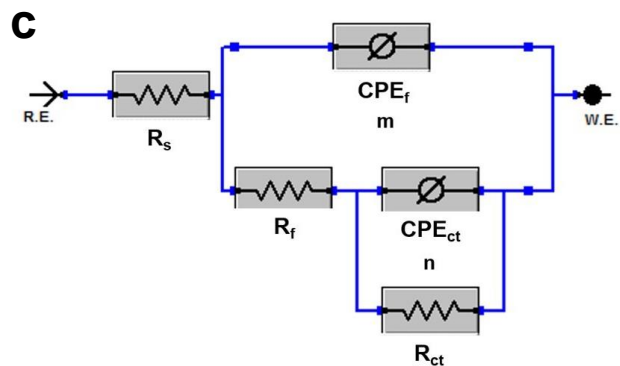

Electrochemical impedance plots of the samples at OCP: (a) Nyquist plot (b) Bode phase angle plot and (c) electrical equivalent circuit

| Sample             | $R_f$ ( $\text{k}\Omega \cdot \text{cm}^2$ ) | $R_{ct}$ ( $\text{k}\Omega \cdot \text{cm}^2$ ) | $R_t$ ( $\text{k}\Omega \cdot \text{cm}^2$ ) | GOF ( $\times 10^{-4}$ ) |
|--------------------|----------------------------------------------|-------------------------------------------------|----------------------------------------------|--------------------------|
| FA-Rib             | 16.2                                         | 246                                             | 262.2                                        | 5.5                      |
| PA-Rib             | 2.9                                          | 27.5                                            | 30.4                                         | 3.2                      |
| Coating [50 g/min] | 1.6                                          | 3.3                                             | 4.9                                          | 2.3                      |

S.K. Nayak et al., J. Alloys Compd. 849 (2020) 156624



## Corroded surface analysis

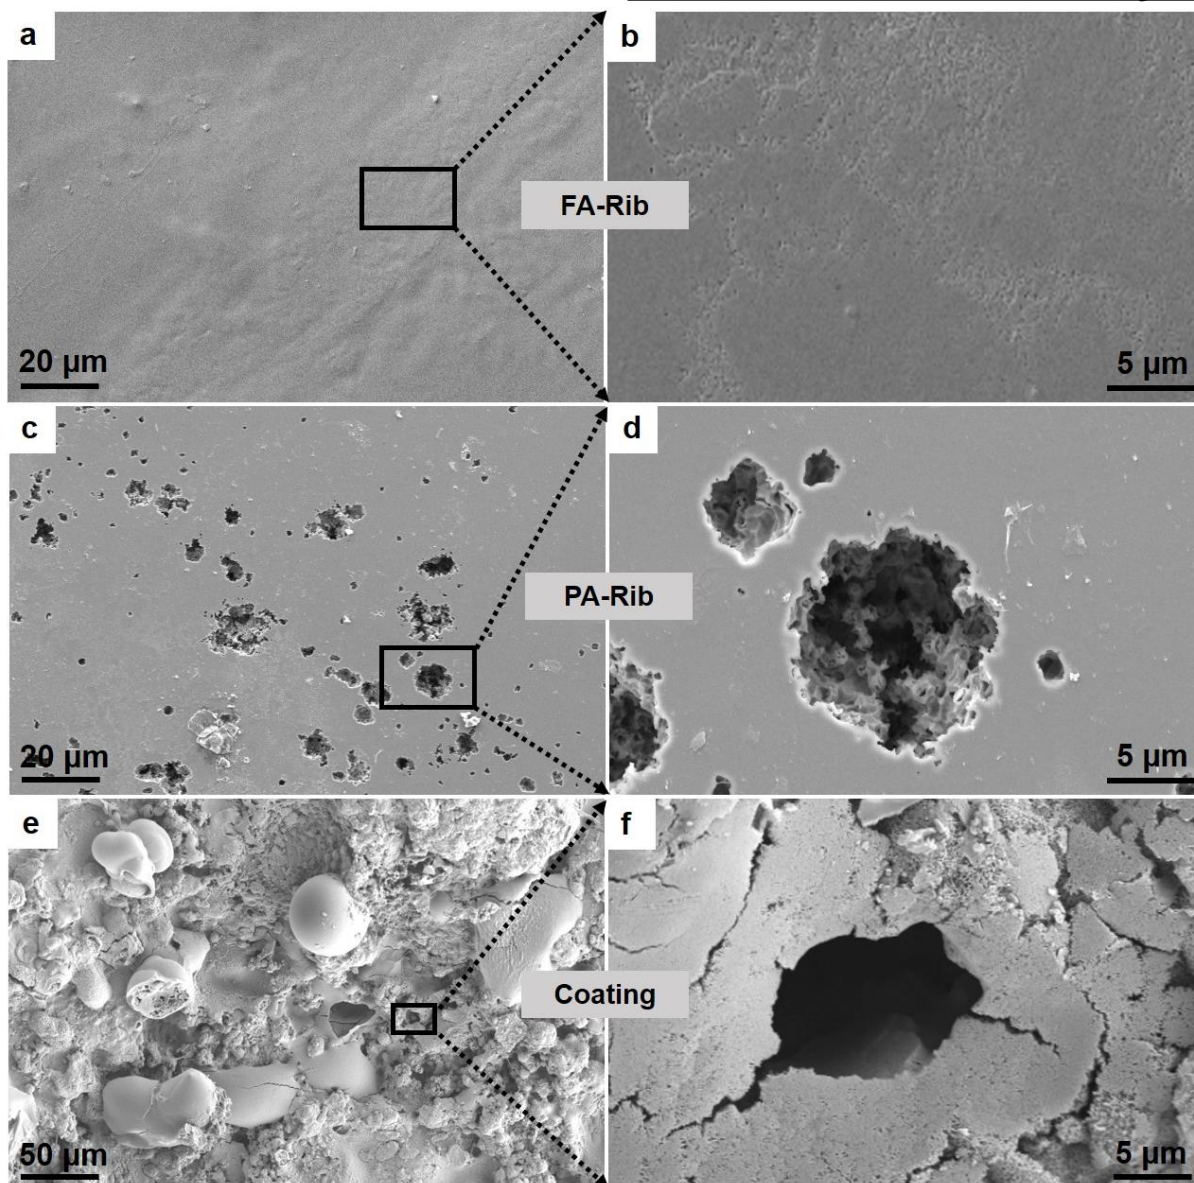

- FA-Rib → pits in the nano-scale range at higher magnification
- PA-Rib → uniformly distributed pits in the size range of 1-10 μm
- Coating → selective dissolution, very large (>10 μm) and deep pits

SEM micrographs of the corroded surface: (a–b) FA-Rib, (c–d) PA-Rib and (e–f) the coating

S.K. Nayak et al., *J. Alloys Compd.* 849 (2020) 156624

## Analysis of corrosion products

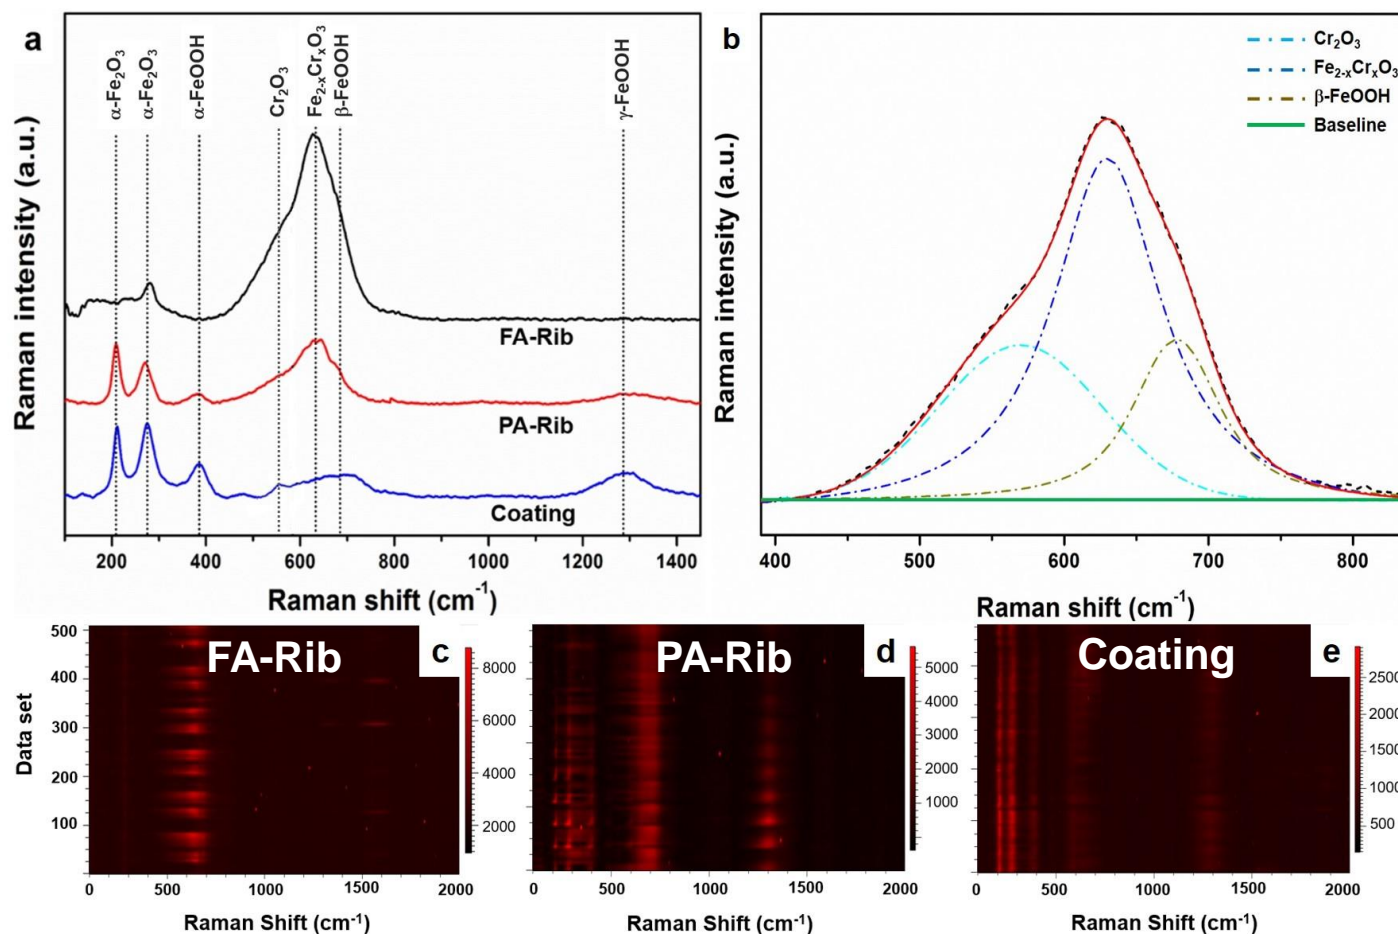

a) Raman spectra of the post-polarized ribbons and coating, (b) de-convoluted Raman spectrum of FA-Rib and (c–e) Raman spectra intensity distribution of the various products

- Relative fraction of protective phases ( $\text{Cr}_2\text{O}_3$  and  $\text{Fe}_{2-x}\text{Cr}_x\text{O}_3$ ): *FA-Rib (0.79), PA-Rib (0.38) and the coating (0.21)*
- Greater influence of reduced amorphicity than that of porosity on the formation of protective phases

## Passive film analysis

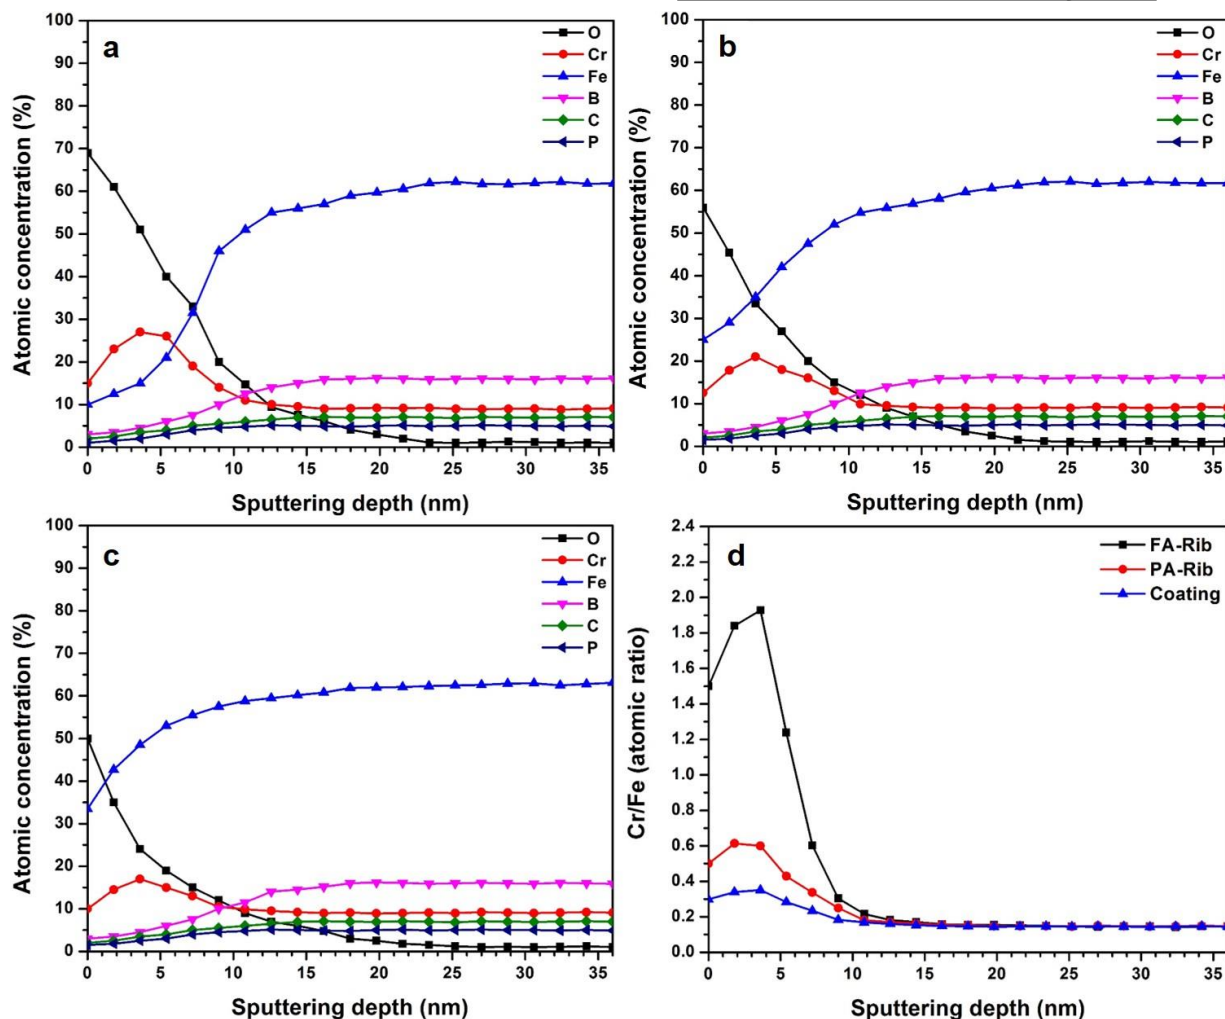

- Thickness of the passive film:
  - (i) FA-Rib (~7.1 nm)
  - (ii) PA-Rib (~4.8 nm)
  - (iii) the coating (~3.7 nm)
- Maximum value of Cr/Fe:
  - (i) FA-Rib- ~1.9
  - (ii) PA-Rib- ~0.6
  - (iii) the coating- ~0.3
- Thinning as well as depletion of Cr in the passive film → majorly by amorphicity

AES concentration depth profiles of various elements obtained from passive films formed on the surface of (a) FA-Rib, (b) PA-Rib and (c) the coating and (d) Cr/Fe ratio in passive films of the samples



## Correlation between corrosion behavior and microstructural features

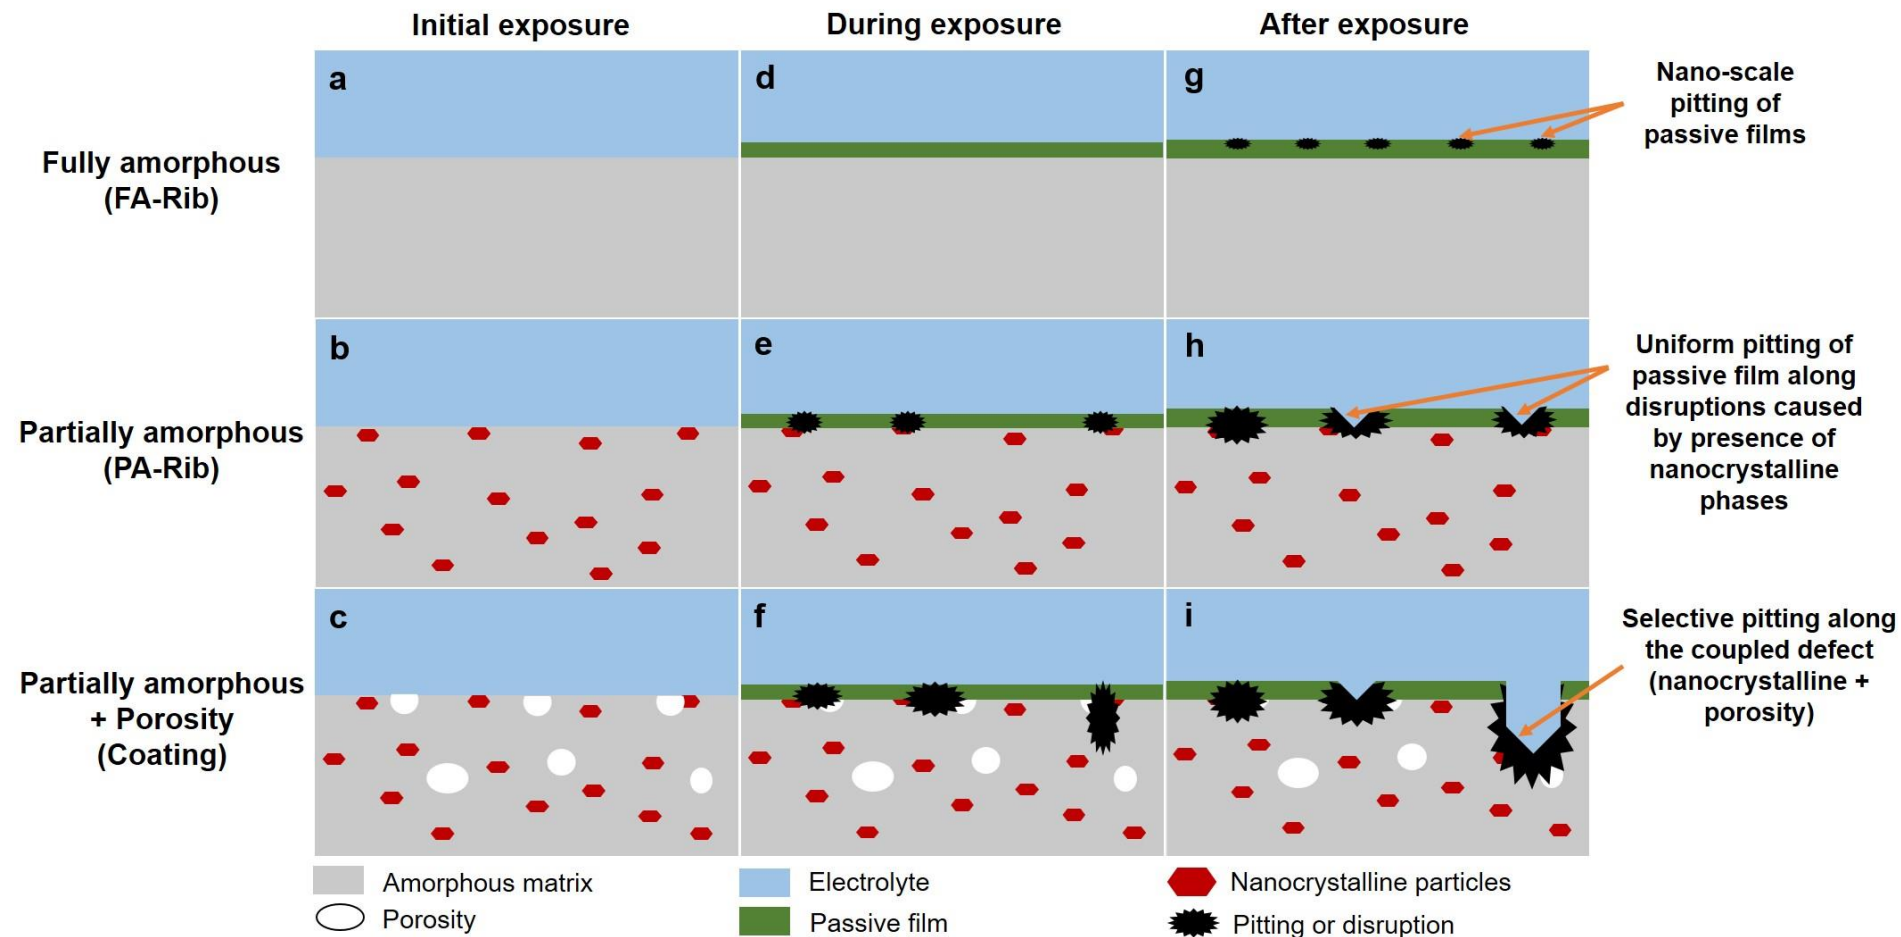

Schematic illustration of the corrosion process during different periods of immersion in electrolyte



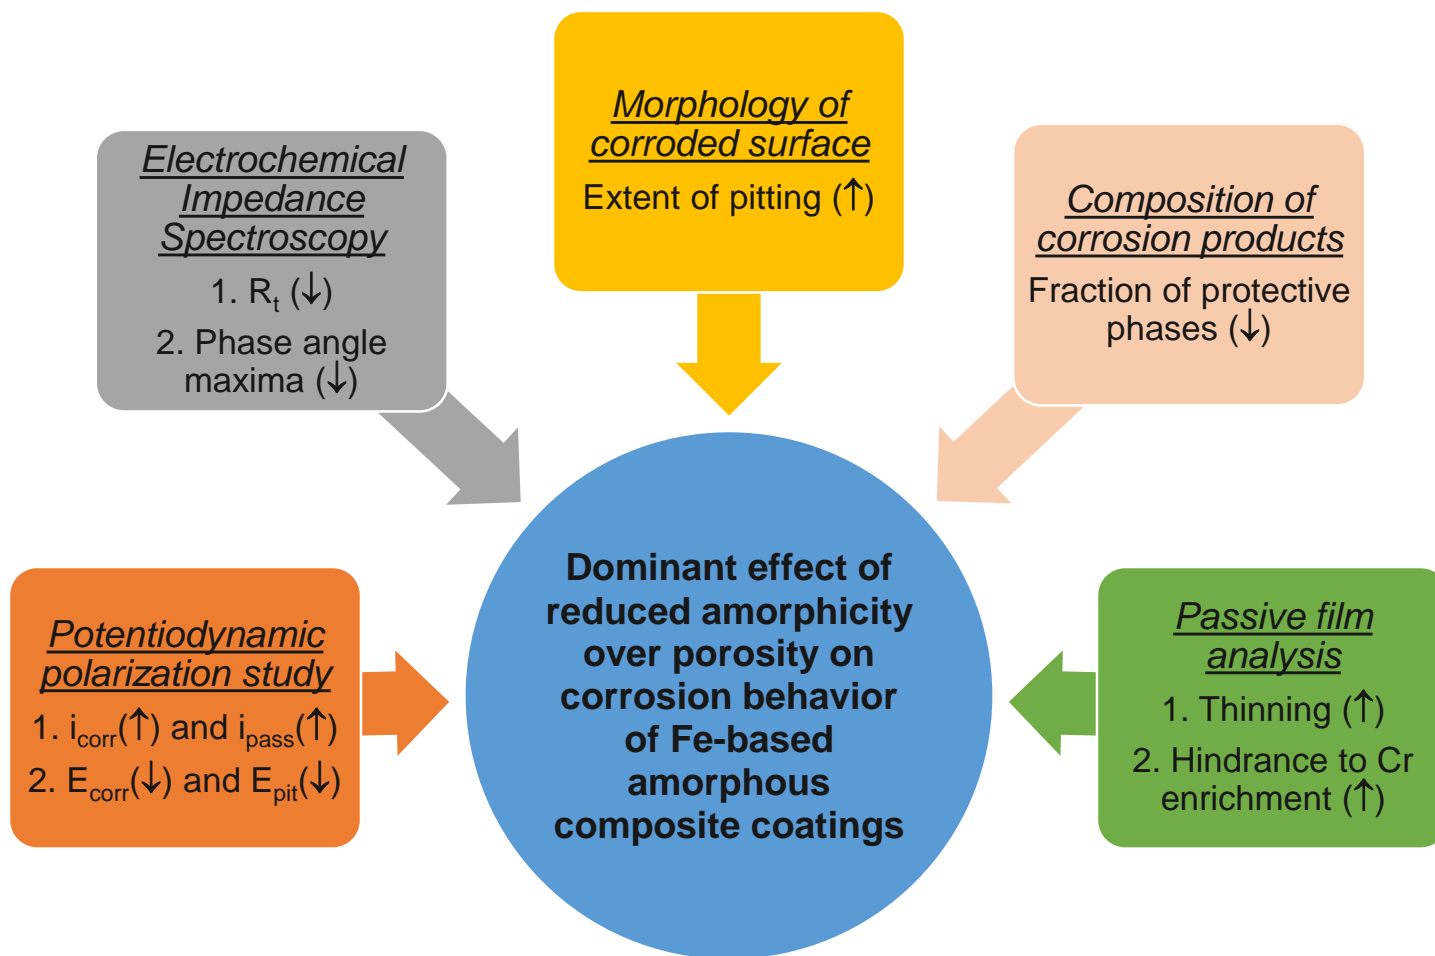

\* (↑) – Increase (↓) – Decrease

## Publications related to this work

- ❑ **S.K. Nayak**, A. Kumar, K. Sarkar, A. Banerjee and T. Laha, Mechanistic insight into the role of amorphicity and porosity on determining the corrosion mitigation behavior of Fe-based amorphous/nanocrystalline coating, *Journal of Alloys and Compounds* 849 (2020) 156624.
- ❑ **S.K. Nayak**, A. Kumar, K. Sarkar, A. Pathak, A. Banerjee and T. Laha, A study on the corrosion inhibition of Fe-based amorphous/nanocrystalline coating synthesized by high-velocity oxy-fuel spraying in an extreme environment, *Journal of Thermal Spray Technology* 28 (2019) 1433-1447.
- ❑ A. Kumar, **S.K. Nayak**, K. Sarkar, A. Banerjee, K. Mondal and T. Laha, Investigation of nano-and micro-scale structural evolution and resulting corrosion resistance in plasma sprayed Fe-based (Fe-Cr-B-C-P) amorphous coatings, *Surface and Coatings Technology* 397 (2020) 126058.
- ❑ P. Bijalwan, A. Kumar, **S.K. Nayak**, A. Banerjee, M. Dutta and T. Laha, Microstructure and corrosion behavior of Fe-based amorphous composite coatings developed by atmospheric plasma spraying, *Journal of Alloys and Compounds* 796 (2019) 47-54.



**Thank You**  
For Your Attention
